# Supplementary material
Source: Springer Nature journal article supplement (https://www.springermedizin.de/resource/supplementary/12985_2010_1382_MOESM3_ESM.pdf/9609704)

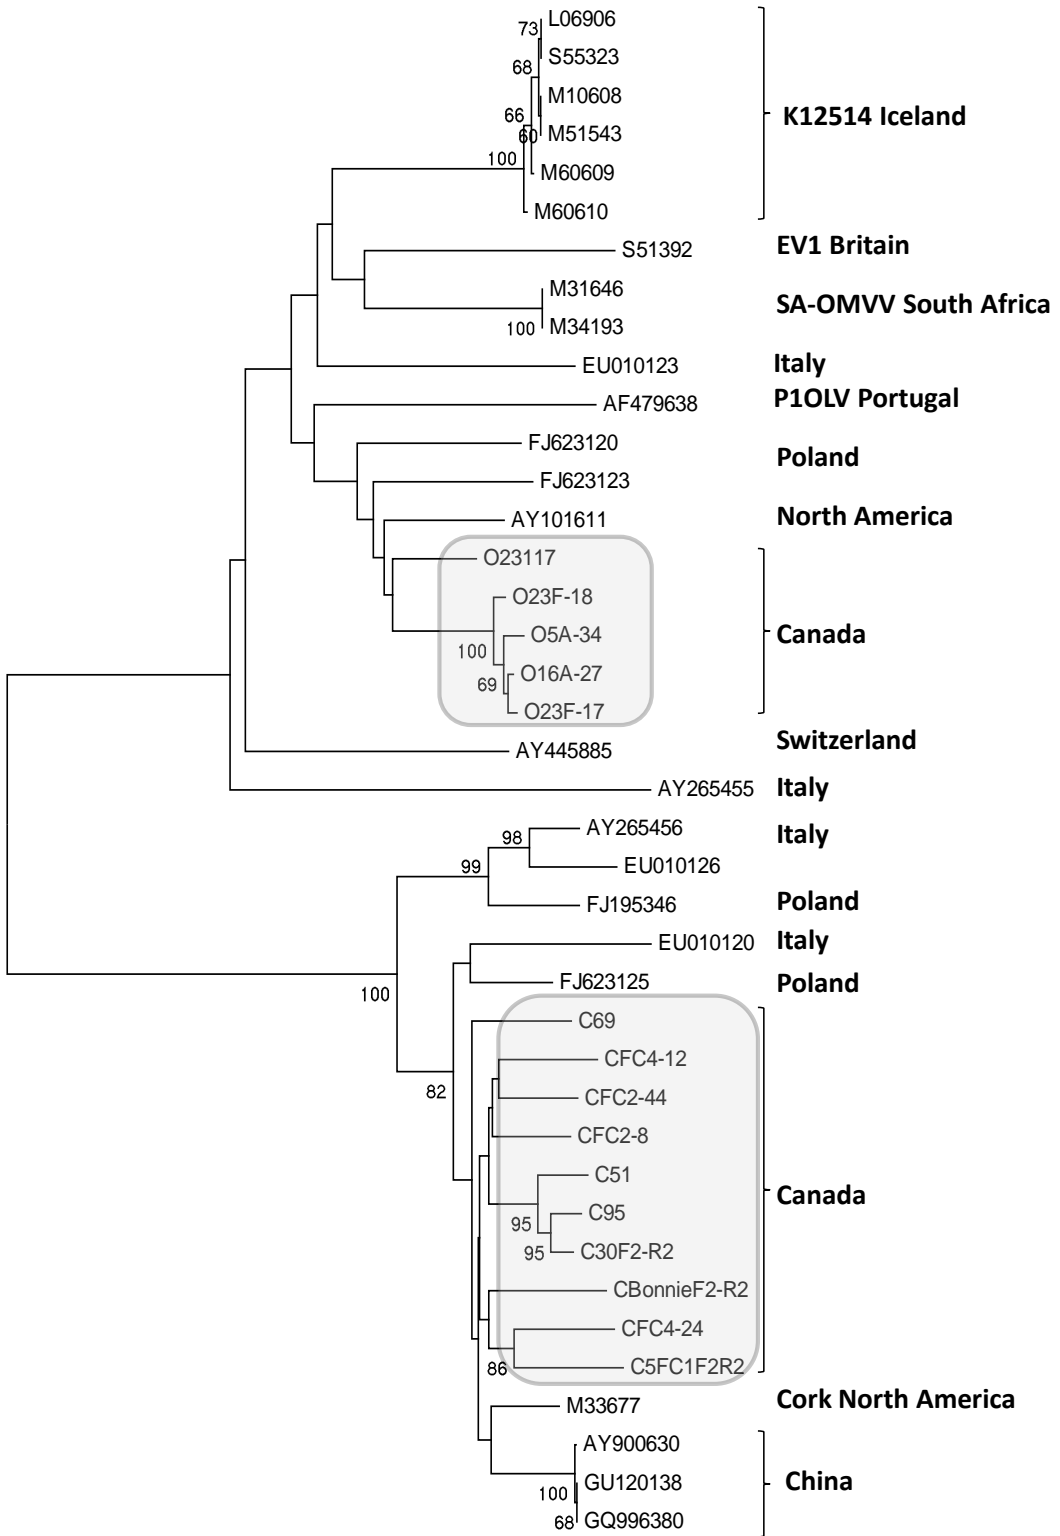

0.05

Supplement: MOESM3 [file 9609704]
